# Supplementary material for: Exosomal circZNF451 restrains anti-PD1 treatment in lung adenocarcinoma via polarizing macrophages by complexing with TRIM56 and FXR1
Source: Springer Nature journal article supplement (doi:10.1186/s13046-022-02505-z), 2022-10-08
Supplement: MOESM4 [file 23584086]

Figure 1C

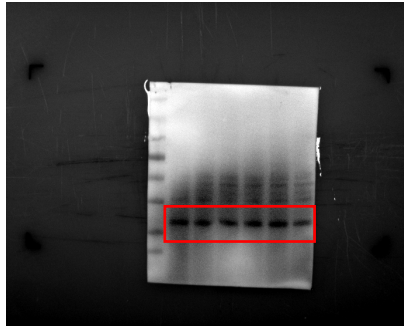

Exosome-CD63

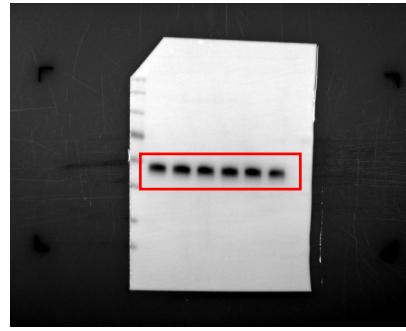

Exosome-TSG101

Figure 3B

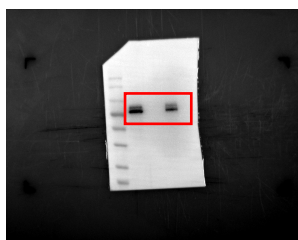

circZNF451 pulldown FXR1

Figure 3C

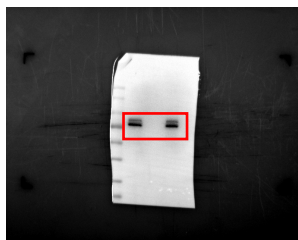

circZNF451 RIP FXR1

Figure 3H

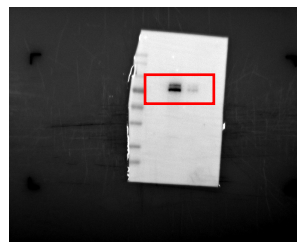

Macrophage FXR1 pulldown

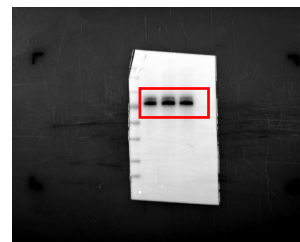

Macrophage FXR1 Input

Figure 3E

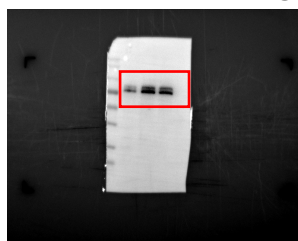macrophage<sup>A549</sup> FXR1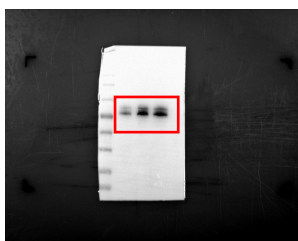macrophage<sup>H1299</sup> FXR1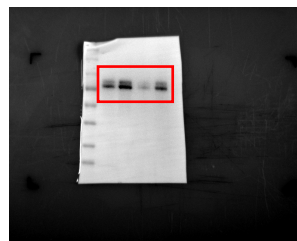macrophage<sup>H1395</sup> FXR1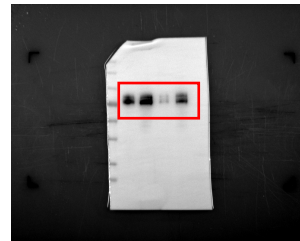macrophage<sup>H1975</sup> FXR1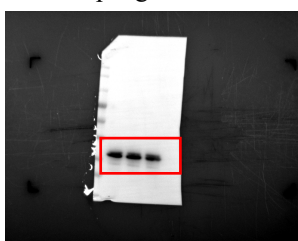macrophage<sup>A549</sup> GAPDH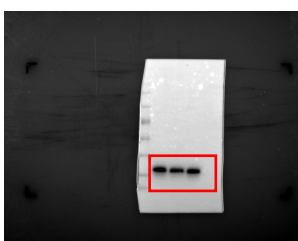macrophage<sup>H1299</sup> GAPDH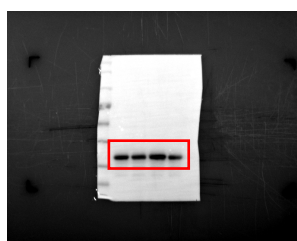macrophage<sup>H1395</sup> GAPDH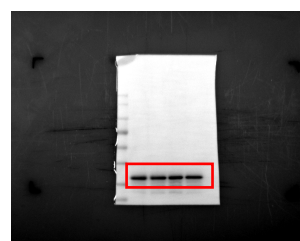macrophage<sup>H1975</sup> GAPDH

Figure 3I

macrophage<sup>A549</sup> FXR1macrophage<sup>H1299</sup> FXR1macrophage<sup>H1395</sup> FXR1macrophage<sup>H1975</sup> FXR1macrophage<sup>A549</sup> GAPDHmacrophage<sup>H1299</sup> GAPDHmacrophage<sup>H1395</sup> GAPDHmacrophage<sup>H1975</sup> GAPDH

Figure 3J

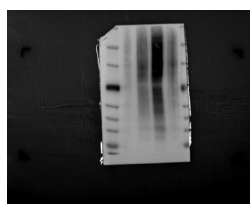macrophage<sup>H1395</sup> circZNF451 FXR1 Ub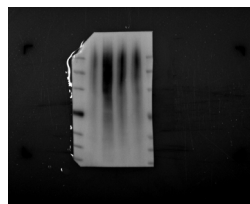macrophage<sup>A549</sup> shcircZNF451 FXR1 Ub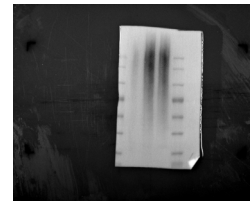macrophage<sup>H1395</sup> GW4869 FXR1 Ub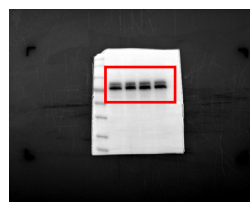macrophage<sup>H1395</sup> circZNF451 FXR1 Input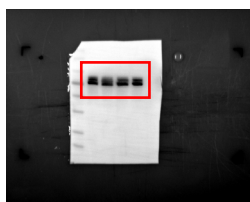macrophage<sup>A549</sup> shcircZNF451 FXR1 Input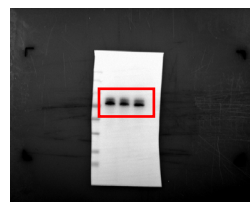macrophage<sup>H1395</sup> GW4869 FXR1 Input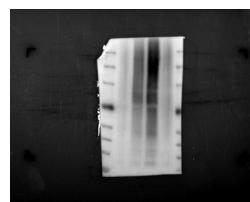macrophage<sup>H1975</sup> circZNF451 FXR1 Ub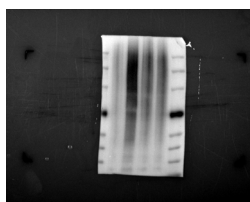macrophage<sup>H1299</sup> shcircZNF451 FXR1 Ub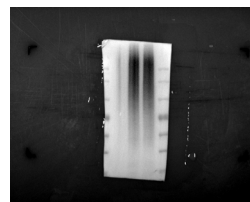macrophage<sup>H1975</sup> GW4869 FXR1 Ub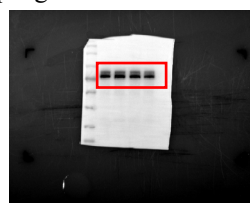macrophage<sup>H1975</sup> circZNF451 FXR1 Input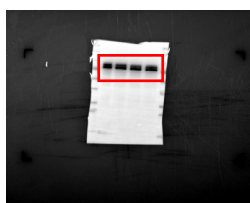macrophage<sup>H1299</sup> shcircZNF451 FXR1 Input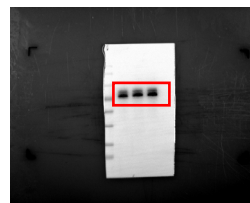macrophage<sup>H1975</sup> GW4869 FXR1 Input

Figure 4A

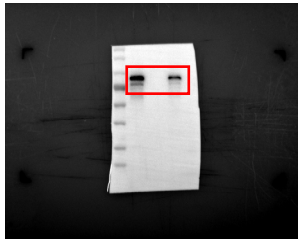

circZNF451 pulldown TRIM56

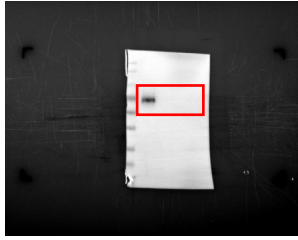

circZNF451 pulldown TRIM25

Figure 4B

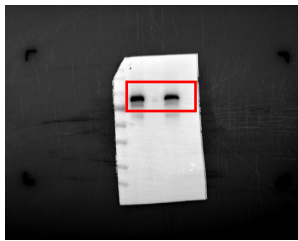

circZNF451 RIP TRIM56

Figure 4C

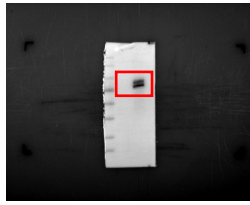

FXR1 IP

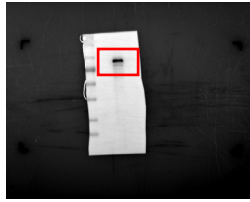

TRIM56 IP

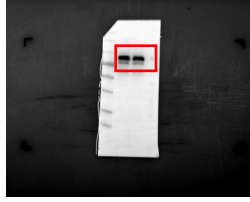

TRIM56 Input

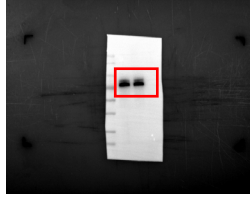

FXR1 Input

Figure 4D

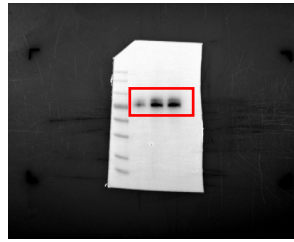

macrophage<sup>H1395</sup> siTRIM56 FXR1

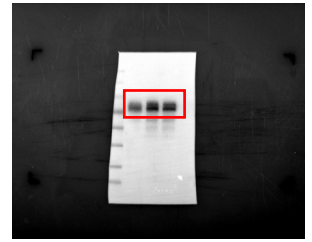

macrophage<sup>H1975</sup> siTRIM56 FXR1

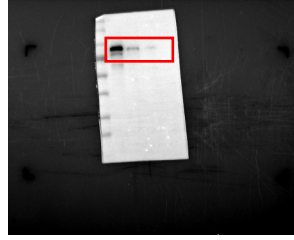

macrophage<sup>H1395</sup> siTRIM56 TRIM56

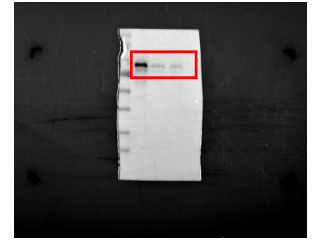

macrophage<sup>H1975</sup> siTRIM56 TRIM56

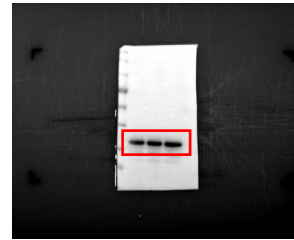

macrophage<sup>H1395</sup> siTRIM56 GAPDH

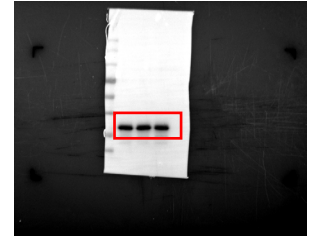

macrophage<sup>H1975</sup> siTRIM56 GAPDH

Figure 4E

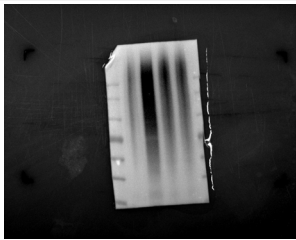

macrophage<sup>H1395</sup> siTRIM56 FXR1 Ub

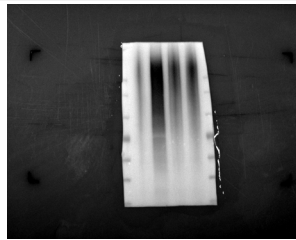

macrophage<sup>H1975</sup> siTRIM56 FXR1 Ub

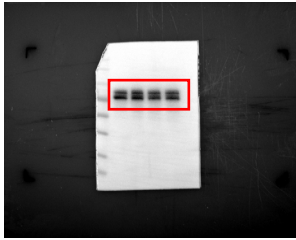

macrophage<sup>H1395</sup> siTRIM56 FXR1 Input

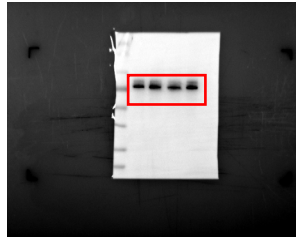

macrophage<sup>H1975</sup> siTRIM56 FXR1 Input

Figure 4F

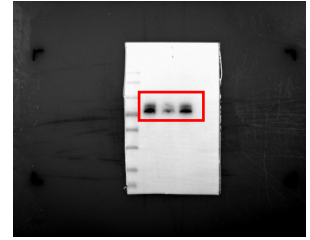

macrophage<sup>A549</sup> TRIM56<sup>mutant</sup> FXR1

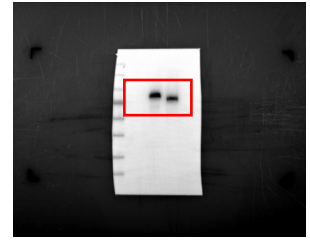

macrophage<sup>A549</sup> TRIM56<sup>mutant</sup> Flag

Figure 4G

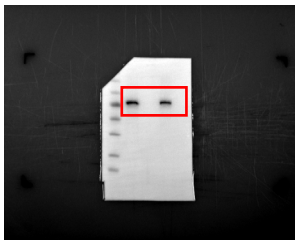

circZNF451 RIP TRIM56 mutant

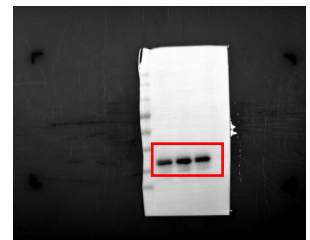

macrophage<sup>A549</sup> TRIM56<sup>mutant</sup> GAPDH

# Figure 4H

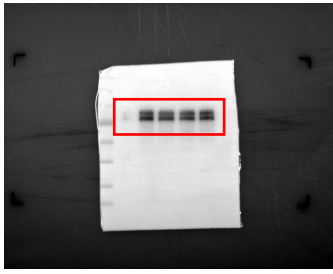

macrophage<sup>H1395</sup> circZNF451<sup>mutant</sup> FXR1 IP

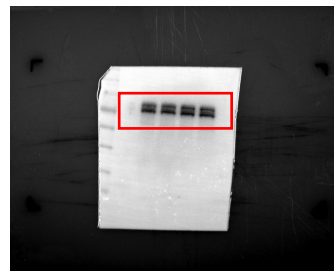

macrophage<sup>H1975</sup> circZNF451<sup>mutant</sup> FXR1 IP

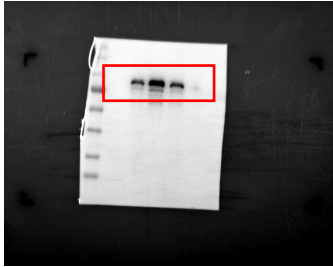

macrophage<sup>H1395</sup> circZNF451<sup>mutant</sup> TRIM56 IP

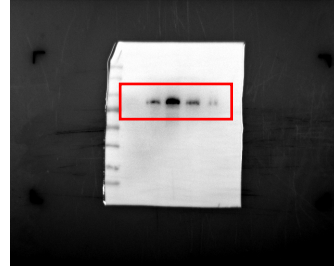

macrophage<sup>H1975</sup> circZNF451<sup>mutant</sup> TRIM56 IP

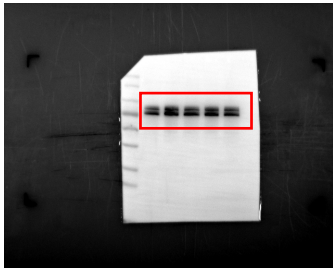

macrophage<sup>H1395</sup> circZNF451<sup>mutant</sup> FXR1 Input

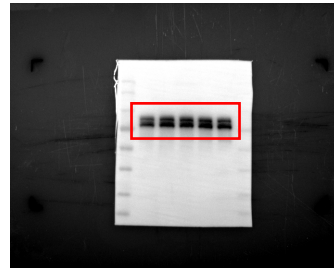

macrophage<sup>H1975</sup> circZNF451<sup>mutant</sup> FXR1 Input

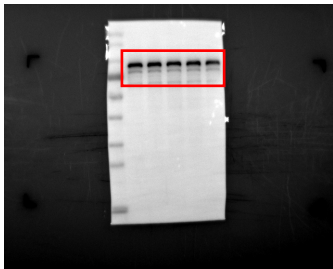

macrophage<sup>H1395</sup> circZNF451<sup>mutant</sup> TRIM56 Input

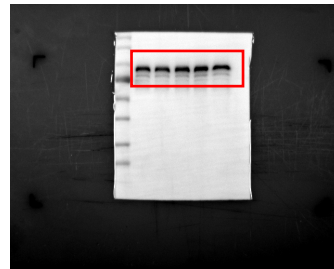

macrophage<sup>H1975</sup> circZNF451<sup>mutant</sup> TRIM56 Input



Figure 5A

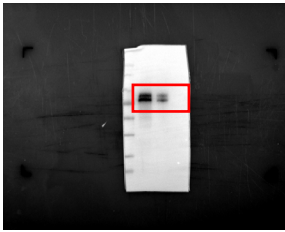

macrophage-siFXR1 FXR1

Figure 6E

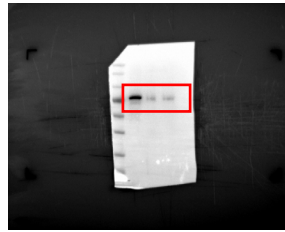

macrophage-siELF4 ELF4

Figure 6K

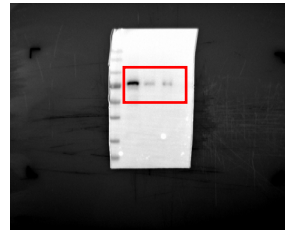

macrophage-siELF4 ELF4

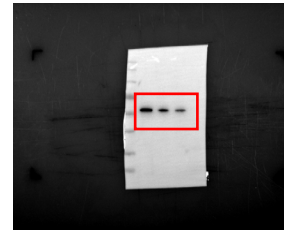

macrophage-siELF4 IRF4

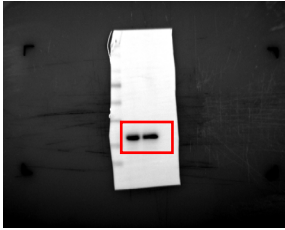

macrophage-siFXR1 GAPDH

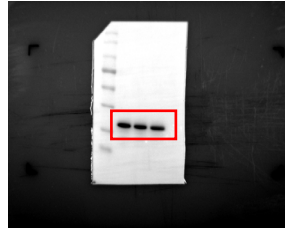

macrophage-siELF4 GAPDH

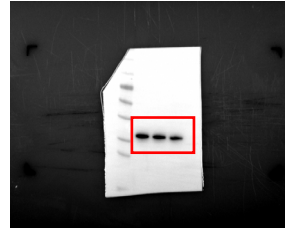

macrophage-siELF4 GAPDH

Figure 6L

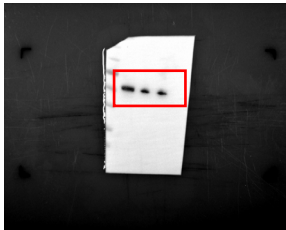

macrophage<sup>A549</sup>shcircZNF451 IRF4

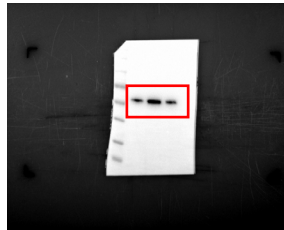

macrophage<sup>H1395</sup>circZNF451 IRF4

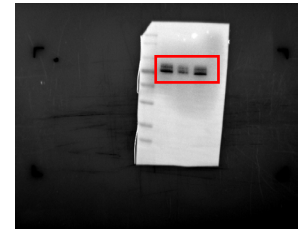

macrophage<sup>H1395</sup>circZNF451 FXR1

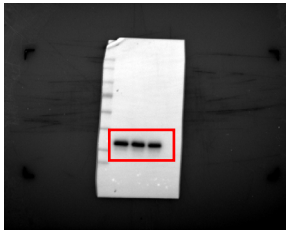

macrophage<sup>A549</sup>shcircZNF451 GAPDH

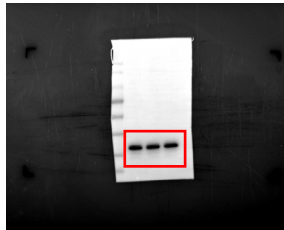

macrophage<sup>H1395</sup>circZNF451 GAPDH

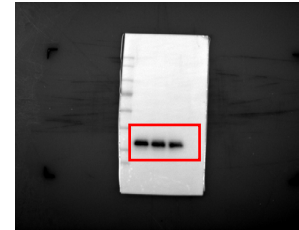

macrophage<sup>H1395</sup>circZNF451 GAPDH

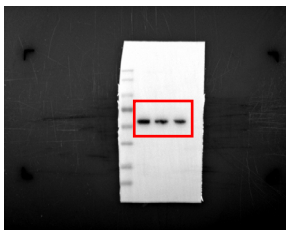

macrophage<sup>H1299</sup>shcircZNF451 IRF4

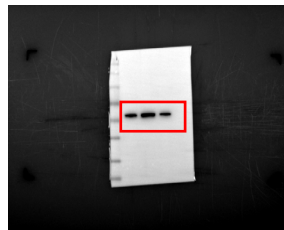

macrophage<sup>H1975</sup>circZNF451 IRF4

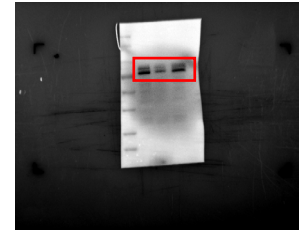

macrophage<sup>H1975</sup>circZNF451 FXR1

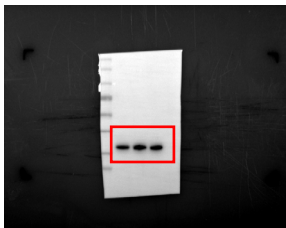

macrophage<sup>H1299</sup>shcircZNF451 GAPDH

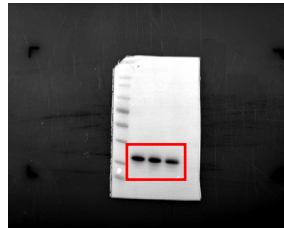

macrophage<sup>H1975</sup>circZNF451 GAPDH

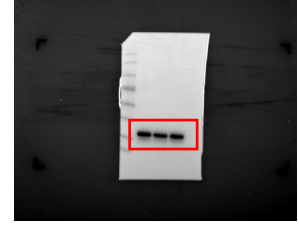

macrophage<sup>H1975</sup>circZNF451 GAPDH

Supplementary Figure 3C

### Supplementary Figure 4A

### Supplementary Figure 4B

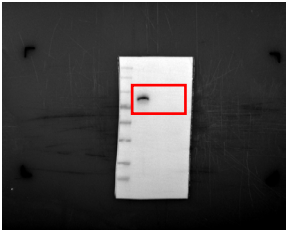

circZNF451 pulldown TRIM56 IP

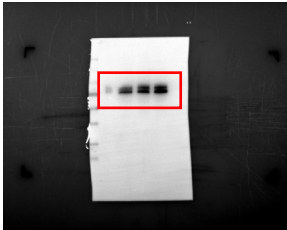

macrophage<sup>A549</sup>shcircZNF451 FXR1 IB

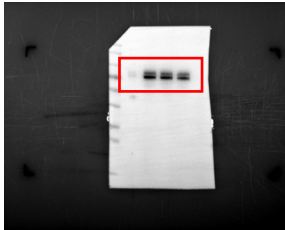

macrophage<sup>H1299</sup>shcircZNF451 FXR1 IB

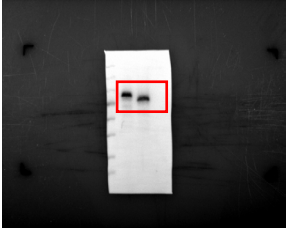

circZNF451 pulldown TRIM56 Input

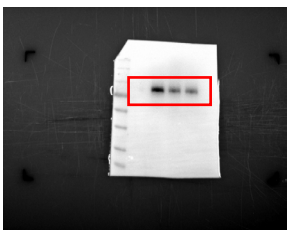

macrophage<sup>A549</sup>shcircZNF451 TRIM56 IB

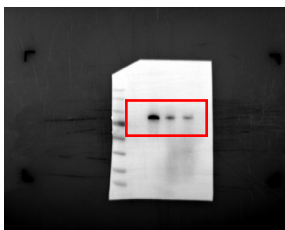

macrophage<sup>H1299</sup>shcircZNF451 TRIM56 IB

### Supplementary Figure 5A

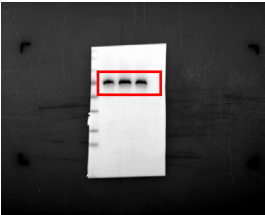

macrophage<sup>H1395</sup> circZNF451 ELF4

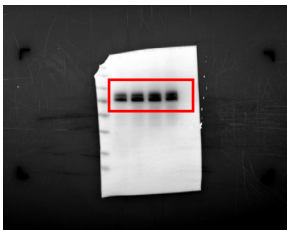

macrophage<sup>A549</sup>shcircZNF451 FXR1 Input

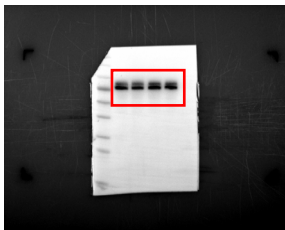

macrophage<sup>H1299</sup>shcircZNF451 FXR1 Input

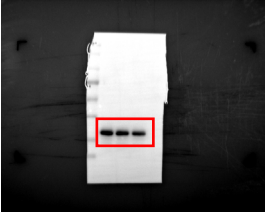

macrophage<sup>H1395</sup> circZNF451 GAPDH

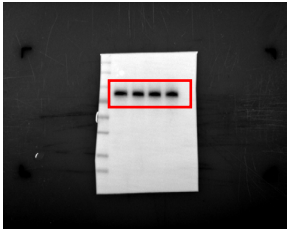

macrophage<sup>A549</sup>shcircZNF451 TRIM56 Input

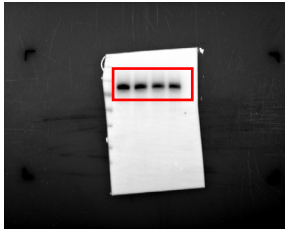

macrophage<sup>H1299</sup>shcircZNF451 TRIM56 Input
